# Supplementary material
Source: PubMed Central journal article supplement (PMC4291479)
Supplement: embj0034-0036-sd9.pdf [file embj0034-0036-sd9.pdf]

Protein interaction analysis for secretogogin in hypothalamus

Experiment: Rat\_combined\_merged.modf

Database Set: 1 Database

Taxonomy: Rattus

Number of Proteins: 84545

Search Engine: Mascot

Version: 2.5.0  
 Samples: All Samples  
 Fragment Tolerance: 0.100 Da (Monoisotopic)  
 Parent Tolerance: 0.050 Da (Monoisotopic)  
 Fixed Modifications: +18 on O (+18), +57 on C (Carbamidomethyl)  
 Variable Modifications: +1 on KQ (diaminodipropylamine), +6 on M (oxidation)  
 Database: the NCBI nr\_20140824 database (selected for Rattus, unknown version, 84045 entries)  
 Digestion Enzyme: Trypsin  
 Max Missed Cleavages: 2  
 Probability Model:

mascot\_dbamon\_merge (F06258): Peptide Prophet [+2 and below,+3,+4,+5,+6 and above]  
 mascot\_dbamon\_merge (F06259): Peptide Prophet [+2 and below,+3,+4,+5,+6 and above]  
 mascot\_dbamon\_merge (F06260): Peptide Prophet [+2 and below,+3,+4,+5,+6 and above]

Scalfold: Version: Scaffold\_4.3.4

Protein Grouping Strategy: Experiment wide grouping with binary peptide protein weights

Peptide Thresholds: 50.0% minimum

Protein Thresholds: 99.0% minimum and 2 peptides minimum

Peptide FDR: 0.0% (Decoy)

Protein FDR: 0.0% (Decoy)

GO Annotation Source(s): UnKnown

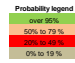

Color coding of functional groups corresponds to the one used in Fig. S1.

| #  | Identified Proteins                                                                     | Accession Number | Molecular Weight | Exclusive Unique Peptide Count |                       |                              | Protein score for a-SCON IP, 10 uM Ca2+ | Presumed or known protein function                                                                                                                                                                                                                   |
|----|-----------------------------------------------------------------------------------------|------------------|------------------|--------------------------------|-----------------------|------------------------------|-----------------------------------------|------------------------------------------------------------------------------------------------------------------------------------------------------------------------------------------------------------------------------------------------------|
|    |                                                                                         |                  |                  | a-SCON IP, Ca2+-free           | a-SCON IP, 10 uM Ca2+ | a-non-target IgG, 10 uM Ca2+ |                                         |                                                                                                                                                                                                                                                      |
| 1  | SECRETAGOGIN                                                                            | gP72261799       | 32 kDa           | 9                              | 11                    | -                            | 528                                     |                                                                                                                                                                                                                                                      |
| 2  | synaptic vesicle membrane protein VAMP1 homolog [Rattus norvegicus]                     | gP18383038       | 43 kDa           | -                              | 4                     | -                            | 222                                     | Integral membrane protein of cholinergic synaptic vesicles thought to be involved in vesicular transport                                                                                                                                             |
| 3  | CCR4-NOT transcription complex subunit 1 [Rattus norvegicus]                            | gP19836347 (+1)  | 267 kDa          | 13                             | 6                     | -                            | 114                                     | Scalloping component of the CCR4-NOT complex, one of the major cellular mRNA deadenylases. Linked to repression during translational initiation and general transcription regulation.                                                                |
| 4  | 26S proteasome non-ATPase regulatory subunit 2 [Rattus norvegicus]                      | gP7225509        | 100 kDa          | -                              | 5                     | -                            | 231                                     | The multisubunit 26S proteasome recognizes, unfolds, and degrades polyubiquitinated substrates into small peptides.                                                                                                                                  |
| 5  | ras-related protein Rab-1A isoform 1 [Rattus norvegicus]                                | gP4758988        | 23 kDa           | -                              | 5                     | -                            | 222                                     | Regulates vesicular protein transport from the endoplasmic reticulum (ER) to the Golgi compartment and onto the cell surface.                                                                                                                        |
| 6  | cell differentiation protein RCD1 homolog                                               | gP11049722       | 34 kDa           | 3                              | 5                     | -                            | 199                                     | Component of the CCR4-NOT complex and is linked to repression during translational initiation and general transcription regulation.                                                                                                                  |
| 7  | EVX1 [Rattus norvegicus]                                                                | gP10302365       | 90 kDa           | -                              | 5                     | -                            | 196                                     | Molecular chaperone that functions in the processing and transport of secreted proteins.                                                                                                                                                             |
| 8  | NSFL1 cofactor p47 [Rattus norvegicus]                                                  | gP14019837 (+1)  | 41 kDa           | -                              | 5                     | -                            | 196                                     | Necessary for the fragmentation of Golgi stacks during mitosis and for VCP-mediated reassembly of Golgi stacks after mitosis.                                                                                                                        |
| 9  | rho GDP-dissociation inhibitor 1                                                        | gP13180300       | 23 kDa           | -                              | 5                     | -                            | 174                                     | Controls Rho proteins homeostasis. Regulates the GDP/GTP exchange reaction of the Rho protein by inhibiting the dissociation of GDP from them, and the subsequent binding of GTP to them.                                                            |
| 10 | phosphoglycolate kinase 1                                                               | gP11420546 (+1)  | 23 kDa           | -                              | 5                     | -                            | 157                                     | Enzyme.                                                                                                                                                                                                                                              |
| 11 | ras-related protein Rab-7a [Rattus norvegicus]                                          | gP13527192 (+2)  | 24 kDa           | -                              | 5                     | -                            | 144                                     | Key regulator in endo-lysosomal trafficking. Governs early-to-late endosomal maturation, microtubule minus-end as well as plus-end directed endosome migration and positioning, and endosome-lysosome transport, and axonal transport.               |
| 12 | peroxiredoxin-4 [Rattus norvegicus]                                                     | gP16758348       | 25 kDa           | -                              | 5                     | -                            | 122                                     | Involved in redox regulation of the cell and likely in the regulation of phospholipid turnover.                                                                                                                                                      |
| 13 | EF-hand domain-containing protein D2 [Rattus norvegicus]                                | gP7225531        | 27 kDa           | -                              | 5                     | -                            | 121                                     | A negative regulator of the canonical NF-kappa-B-activating branch.                                                                                                                                                                                  |
| 14 | NDRG1 related protein NDRG2b2 [Rattus norvegicus]                                       | gP1797872 (+3)   | 39 kDa           | -                              | 4                     | -                            | 175                                     | Early neurotrophic factor-specific induced gene. Contributes to the regulation of the Wnt signaling pathway.                                                                                                                                         |
| 15 | lysine-associated protein [Rattus norvegicus]                                           | gP10174 (+1)     | 52 kDa           | -                              | 4                     | -                            | 169                                     | Diversity regulates filament dynamics and has been implicated in morphological processes.                                                                                                                                                            |
| 16 | alpha-synuclein [Rattus norvegicus]                                                     | gP5597125 (+1)   | 15 kDa           | -                              | 4                     | -                            | 120                                     | May be involved in the regulation of dopamine release and transport.                                                                                                                                                                                 |
| 17 | Ca2+-dependent secretin activator, isoform CRA_a [Rattus norvegicus]                    | gP14904049 (+1)  | 153 kDa          | -                              | 4                     | -                            | 112                                     | Calcium-binding protein involved in exocytosis of neurotransmitter-peptide-laden vesicles.                                                                                                                                                           |
| 18 | calreticulin precursor [Rattus norvegicus]                                              | gP11989176       | 48 kDa           | -                              | 4                     | -                            | 112                                     | Calcium-binding chaperone that promotes folding, oligomeric assembly and quality control in the ER. Interacts with the DNA-binding domain of the glucocorticoid receptor and prevents from binding to its specific glucocorticoid response elements. |
| 19 | lecithin 2 [Rattus norvegicus]                                                          | gP17800205       | 110 kDa          | -                              | 4                     | -                            | 105                                     | Mediates importin-alpha export from the nucleus to the cytoplasm after import substrates (cargo) have been released into the nucleoplasm.                                                                                                            |
| 20 | pyridoxal kinase [Rattus norvegicus]                                                    | gP13392082 (+1)  | 35 kDa           | -                              | 4                     | -                            | 97                                      | Required for the synthesis of pyridoxal-5-phosphate from vitamin B6.                                                                                                                                                                                 |
| 21 | myosin-10 [Rattus norvegicus]                                                           | gP1332970 (+3)   | 229 kDa          | -                              | 4                     | -                            | 94                                      | Binds to actin filaments and actin bundles and functions as plus-end-directed motor. May play a role in neurite outgrowth and axon guidance.                                                                                                         |
| 22 | 26S proteasome non-ATPase regulatory subunit 8 [Rattus norvegicus]                      | gP16442026       | 49 kDa           | -                              | 4                     | -                            | 94                                      | The multisubunit 26S proteasome recognizes, unfolds, and degrades polyubiquitinated substrates into small peptides.                                                                                                                                  |
| 23 | guanine nucleotide-binding protein (Gq) subunit alpha [Rattus norvegicus]               | gP13591957 (+1)  | 42 kDa           | -                              | 4                     | -                            | 90                                      | The encoded protein, an alpha subunit in the Gq class, couples a seven-transmembrane domain receptor to activation of phospholipase C-beta.                                                                                                          |
| 24 | connexin45 and adenosine receptor homolog precursor [Rattus norvegicus]                 | gP56981616 (+3)  | 39 kDa           | -                              | 4                     | -                            | 88                                      | Component of the epithelial apical junction complex that may function as a hemophilic cell adhesion molecule and is essential for tight junction integrity.                                                                                          |
| 25 | dihydropyridine reductase [Rattus norvegicus]                                           | gP111693160 (+2) | 26 kDa           | -                              | 3                     | -                            | 290                                     | Catalyzes the NADH-mediated reduction of quinoid dihydrobiopterin.                                                                                                                                                                                   |
| 26 | ras-related protein Rab-5B [Rattus norvegicus]                                          | gP121583768      | 24 kDa           | -                              | 3                     | -                            | 146                                     | Probably involved in vesicular traffic.                                                                                                                                                                                                              |
| 27 | protein FAM59B                                                                          | gP21450023 (+1)  | 37 kDa           | -                              | 3                     | -                            | 141                                     | Function at present is unclear.                                                                                                                                                                                                                      |
| 28 | omega-amidase NT2 [Rattus norvegicus]                                                   | gP77628000       | 31 kDa           | -                              | 3                     | -                            | 132                                     | A role in anti-toxicity has been implied.                                                                                                                                                                                                            |
| 29 | glutathione-S-transferase [Rattus norvegicus]                                           | gP78187979 (+1)  | 38 kDa           | 0                              | 3                     | -                            | 128                                     | Glutathione S-transferases are oxidoreductase enzymes that reduce a variety of substrates using glutathione as a cofactor.                                                                                                                           |
| 30 | dual specificity mitogen-activated protein kinase kinase 4                              | gP22090221 (+1)  | 44 kDa           | -                              | 3                     | -                            | 127                                     | Dual specificity protein kinase which acts as an essential component of the MAP kinase signal transduction pathway.                                                                                                                                  |
| 31 | Vps35 protein [Rattus norvegicus]                                                       | gP197246879 (+1) | 72 kDa           | -                              | 3                     | -                            | 124                                     | A component of a large multimeric complex, termed the retromer complex, involved in retrograde transport of proteins from endosomes to the trans-Golgi network.                                                                                      |
| 32 | WD repeat protein 1 [Rattus norvegicus]                                                 | gP144004324 (+1) | 66 kDa           | -                              | 3                     | -                            | 124                                     | Induces disassembly of actin filaments in conjunction with ADF/cofilin family proteins.                                                                                                                                                              |
| 33 | beta(1)-microglobulin related membrane protein 2 [Rattus norvegicus]                    | gP51549528       | 41 kDa           | -                              | 3                     | -                            | 115                                     | Catalyzes the co-trans isomerization of proline imidic peptide bonds in oligopeptides and accelerates protein folding.                                                                                                                               |
| 34 | alpha-synuclein NSF attachment protein [Rattus norvegicus]                              | gP18034791       | 33 kDa           | -                              | 3                     | -                            | 112                                     | Plays a role in the completion of membrane fusion by mediating the interaction of N-ethylmaleimide-sensitive factor (NSF) with the vesicle-associated and membrane-associated SNAP receptor (SNARE) complex, stimulating the ATPase activity of NSF. |
| 35 | intral glutamine-rich transmembrane repeat-containing protein alpha [Rattus norvegicus] | gP12083967 (+3)  | 34 kDa           | -                              | 3                     | -                            | 108                                     | Co-chaperone that binds directly to HSC70 and HSP70 and regulates their ATPase activity.                                                                                                                                                             |
| 36 | ras-related protein Rab-5a isoform 2                                                    | gP13199274 (+1)  | 24 kDa           | -                              | 3                     | -                            | 101                                     | Located at the Golgi apparatus, regulates trafficking in both retrograde and anterograde directions.                                                                                                                                                 |
| 37 | adrenoleukine 1, isoform CRA_c [Rattus norvegicus]                                      | gP14903004 (+1)  | 23 kDa           | -                              | 3                     | -                            | 101                                     | Catalyzes the reversible transfer of the serine phosphoryl group between ATP and AMP.                                                                                                                                                                |
| 38 | Chan A, Nier Solution Structure Of Ca2+-Loaded Cabindin D2bK                            | gP111059202 (+2) | 30 kDa           | -                              | 3                     | -                            | 99                                      | Calcium-binding protein.                                                                                                                                                                                                                             |
| 39 | PREDICTED: biliverdin reductase A isoform X1 [Rattus norvegicus]                        | gP56434205       | 7                | -                              | 3                     | -                            | 93                                      | Reduces the gamma-methane bridge of the open tetrapyrrole, biliverdin IX alpha, to bilibavin with the concomitant oxidation of a NADH or NADPH cofactor.                                                                                             |
| 40 | inositolase [Rattus norvegicus]                                                         | gP13018252 (+3)  | 71 kDa           | -                              | 3                     | -                            | 92                                      | Enzyme.                                                                                                                                                                                                                                              |
| 41 | phosphoserine aminotransferase [Rattus norvegicus]                                      | gP149062533 (+2) | 41 kDa           | -                              | 3                     | -                            | 91                                      | A phosphoserine aminotransferase whose decreased expression may be associated with schizophrenia.                                                                                                                                                    |
| 42 | CCR4-NOT transcription complex subunit 7                                                | gP7875126        | 33 kDa           | 4                              | 3                     | -                            | 85                                      | Catalytic component of the CCR4-NOT complex.                                                                                                                                                                                                         |
| 43 | RAP1, GTP-GDP dissociation stimulator 1 [precursor], isoform CRA_a [Rattus norvegicus]  | gP14802806 (+1)  | 58 kDa           | -                              | 3                     | -                            | 85                                      | Stimulates GDI/GTP exchange reaction of a group of small GTP-binding proteins. Neurite outgrowth.                                                                                                                                                    |
| 44 | purine nucleoside phosphorylase [Rattus norvegicus]                                     | gP564395910      | 24 kDa           | -                              | 3                     | -                            | 84                                      | Purine nucleoside phosphorylase.                                                                                                                                                                                                                     |
| 45 | transmembrane protein TMEM103 [Rattus norvegicus]                                       | gP1360136 (+1)   | 23 kDa           | -                              | 3                     | -                            | 80                                      | This type I membrane protein is localized at the plasma membrane and Golgi ciscomae and is involved in vesicular protein trafficking.                                                                                                                |
| 46 | 26S proteasome non-ATPase regulatory subunit 13 [Rattus norvegicus]                     | gP157621581      | 43 kDa           | -                              | 3                     | -                            | 71                                      | The multisubunit 26S proteasome recognizes, unfolds, and degrades polyubiquitinated substrates into small peptides.                                                                                                                                  |
| 47 | PHF-13, C-domain-containing protein 3 [Rattus norvegicus]                               | gP107818623      | 38 kDa           | -                              | 3                     | -                            | 71                                      | Excites phosphoric diester (phosphodiester) activity and signal transducer activity.                                                                                                                                                                 |
| 48 | kleisanin-1 heavy chain [Rattus norvegicus]                                             | gP149030557 (+1) | 110 kDa          | -                              | 2                     | -                            | 131                                     | Microtubule-dependent motor required for slow axonal transport of neurofilament proteins.                                                                                                                                                            |
| 49 | phosphatidylinositol transfer protein alpha isoform 2 [Rattus norvegicus]               | gP3839362        | 32 kDa           | -                              | 2                     | -                            | 127                                     | Catalyzes the transfer of PtdIns and phosphatidylocholine between membranes. Phospholipase C signaling.                                                                                                                                              |
| 50 | Plasma membrane calcium-transporting ATPase 2                                           | gP1428610 (+1)   | 127 kDa          | -                              | 2                     | -                            | 125                                     | Plasma membrane calcium-transporting ATPase.                                                                                                                                                                                                         |
| 51 | beta-tubulin 3 [Rattus norvegicus]                                                      | gP140555940 (+3) | 110 kDa          | -                              | 2                     | -                            | 123                                     | May regulate the disassembly of focal adhesions.                                                                                                                                                                                                     |
| 52 | hydroxymethylglutaryl-CoA synthase, cytoplasmic [Rattus norvegicus]                     | gP149059420 (+1) | 61 kDa           | -                              | 2                     | -                            | 118                                     | Calcium-transporting ATPase.                                                                                                                                                                                                                         |
| 53 | nuclear migration protein nucl [Rattus norvegicus]                                      | gP384272 (+1)    | 38 kDa           | -                              | 2                     | -                            | 110                                     | Plays a role in neurogenesis and neuronal migration.                                                                                                                                                                                                 |
| 54 | gamma-tubulin NSF attachment protein [Rattus norvegicus]                                | gP14804444 (+2)  | 34 kDa           | -                              | 2                     | -                            | 109                                     | Required for vesicular transport between the endoplasmic reticulum and the Golgi apparatus.                                                                                                                                                          |
| 55 | Evx1b1, C/EBP1 homolog (variant) isoform CRA_b [Rattus norvegicus]                      | gP14044800 (+1)  | 114 kDa          | -                              | 2                     | -                            | 108                                     | Mediates the nuclear export of cellular proteins (cargo) bearing a leucine-rich nuclear export signal (NES) and of RNAs.                                                                                                                             |
| 56 | Cytosolic 10-formyltetrahydrofolate dehydrogenase [Rattus norvegicus]                   | gP380866476      | 99 kDa           | 1                              | 2                     | -                            | 107                                     | Enzyme.                                                                                                                                                                                                                                              |
| 57 | glyoxal-3-phosphoglycolate dehydrogenase 1-like protein [Rattus norvegicus]             | gP300798467      | 38 kDa           | -                              | 2                     | -                            | 106                                     | Enzyme.                                                                                                                                                                                                                                              |
| 58 | inositolase [Rattus norvegicus]                                                         | gP13002024 (+3)  | 27 kDa           | -                              | 2                     | -                            | 104                                     | Enzyme.                                                                                                                                                                                                                                              |
| 59 | protein phosphatase 1, regulatory (inhibitor) subunit 7 [Rattus norvegicus]             | gP149037520 (+2) | 37 kDa           | -                              | 2                     | -                            | 103                                     | Regulatory subunit of protein phosphatase 1.                                                                                                                                                                                                         |
| 60 | transforming protein RhoA precursor [Rattus norvegicus]                                 | gP11602961 (+1)  | 22 kDa           | -                              | 2                     | -                            | 102                                     | Regulates a signal transduction pathway linking plasma membrane receptors to the assembly of focal adhesions and actin stress fibers.                                                                                                                |
| 61 | CDK9 [Rattus norvegicus]                                                                | gP13194518 (+1)  | 48 kDa           | -                              | 2                     | -                            | 99                                      | Control over ubiquitin-proteasome-mediated protein degradation.                                                                                                                                                                                      |
| 62 | ataxin-10 [Rattus norvegicus]                                                           | gP25742874       | 54 kDa           | -                              | 2                     | -                            | 92                                      | Necessary for the survival of e.g. cerebellar neurons.                                                                                                                                                                                               |
| 63 | system 7, isoform CRA_b [Rattus norvegicus]                                             | gP149020911 (+2) | 25 kDa           | -                              | 2                     | -                            | 92                                      | May be involved in protein trafficking from the plasma membrane to the early endosome, as well as in homotypic fusion of endocytic organelles.                                                                                                       |
| 64 | PREDICTED: LOW QUALITY PROTEIN: anti-binding protein 3, partial [Rattus norvegicus]     | gP149042681 (+1) | 69 kDa           | 1                              | 2                     | -                            | 90                                      | May act as an adapter protein to couple membrane receptors to intracellular signaling pathways. May be involved in signaling of ITGB2/LFA-1 and other integrins.                                                                                     |
| 65 | isocholate sensitive dehydrogenase, partial [Rattus norvegicus]                         | gP556396         | 52 kDa           | -                              | 2                     | -                            | 86                                      | Enzyme.                                                                                                                                                                                                                                              |
| 66 | synaptophysin [Rattus norvegicus]                                                       | gP56823 (+1)     | 52 kDa           | -                              | 2                     | -                            | 87                                      | Probably involved in structural functions as organizing other membrane components or in targeting vesicles to the plasma membrane.                                                                                                                   |
| 67 | CCR4-NOT transcription complex, subunit 3 [Rattus norvegicus]                           | gP29345478       | 82 kDa           | 3                              | 2                     | -                            | 86                                      | Component of the CCR4-NOT complex which is one of the major cellular mRNA deadenylases.                                                                                                                                                              |
| 68 | lumen protein Dc2 [Rattus norvegicus]                                                   | gP17829284 (+8)  | 24 kDa           | -                              | 2                     | -                            | 86                                      | A novel molecular marker in ovarian cancer, enables calcium-binding activity.                                                                                                                                                                        |
| 69 | ubiquitin polymerization-promoting protein family member 3 [Rattus norvegicus]          | gP5726937        | 19 kDa           | -                              | 2                     | -                            | 85                                      | Binds tubulin and has microtubule bundling activity.                                                                                                                                                                                                 |
| 70 | prostaglandin-E synthase 3                                                              | gP790017 (+1)    | 19 kDa           | -                              | 2                     | -                            | 84                                      | Molecular chaperone that localizes to genomic response elements in a hormone-dependent manner and disrupts receptor-mediated transcriptional activation, by promoting disassembly of transcriptional regulatory complexes.                           |
| 71 | glyoxalase I isoform 1 [Rattus norvegicus]                                              | gP13502025 (+1)  | 44 kDa           | -                              | 2                     | -                            | 84                                      | Enzyme.                                                                                                                                                                                                                                              |
| 72 | ras-related protein Rab-5A [Rattus norvegicus]                                          | gP1298346 (+1)   | 24 kDa           | -                              | 2                     | -                            | 83                                      | Required for the fusion of the plasma membrane and early endosomes.                                                                                                                                                                                  |
| 73 | phosphoglycolate phosphatase [Rattus norvegicus]                                        | gP281332119      | 35 kDa           | -                              | 2                     | -                            | 83                                      | Has high phosphatase activity toward ADP, ATP, GDP, GTP and p-nitrophenylphosphate.                                                                                                                                                                  |
| 74 | isocholate dehydrogenase [NADP] cytoplasmic [Rattus norvegicus]                         | gP13528600       | 47 kDa           | -                              | 2                     | -                            | 82                                      | Enzyme.                                                                                                                                                                                                                                              |

|     |                                                                                                          |                  |         |   |   |   |    |                                                                                                                                                                                                                                        |
|-----|----------------------------------------------------------------------------------------------------------|------------------|---------|---|---|---|----|----------------------------------------------------------------------------------------------------------------------------------------------------------------------------------------------------------------------------------------|
| 75  | ras-related protein Rab-5C [Rattus norvegicus]                                                           | g034780697       | 23 kDa  | - | 2 | - | 82 | Protein transport. Probably involved in vesicular traffic.                                                                                                                                                                             |
| 76  | protein kinase cAMP-dependent, regulatory, type 2, alpha [Rattus norvegicus]                             | g114818505 (+3)  | 45 kDa  | - | 2 | - | 80 | The regulatory subunit of protein kinase A.                                                                                                                                                                                            |
| 77  | beta (Hsp90) homolog subfamily B member [Rattus norvegicus]                                              | g165434667       | 7       | - | 2 | - | 80 | Interacts with HSP70 and can stimulate its ATPase activity.                                                                                                                                                                            |
| 78  | secamin-1 [Rattus norvegicus]                                                                            | g16163665        | 46 kDa  | - | 2 | - | 79 | Regulates eicosynolysis in mast cells.                                                                                                                                                                                                 |
| 79  | Vdac1 protein, partial [Rattus norvegicus]                                                               | g13851979 (+3)   | 32 kDa  | - | 2 | - | 79 | A voltage-dependent anion channel protein that is a major component of the outer mitochondrial membrane.                                                                                                                               |
| 80  | protein phosphatase 5A [Rattus norvegicus]                                                               | g16354072 (+2)   | 42 kDa  | - | 2 | - | 78 | protein phosphatase.                                                                                                                                                                                                                   |
| 81  | NmIIA-like family domain-containing protein 1                                                            | g1224493153 (+2) | 17 kDa  | - | 2 | - | 78 | Redox sensor protein.                                                                                                                                                                                                                  |
| 82  | COPI9 ubiquitin-proteasome complex subunit 3 [Rattus norvegicus]                                         | g151948372       | 48 kDa  | - | 2 | - | 78 | Controls ubiquitin-proteasome-mediated protein degradation.                                                                                                                                                                            |
| 83  | D-3-hydroxyglutamate dehydrogenase [Rattus norvegicus]                                                   | g113526850       | 56 kDa  | 0 | 2 | - | 77 | Is involved in the early steps of L-carnitine synthesis in animal cells.                                                                                                                                                               |
| 84  | ADP-ribosylation factor-like protein 3 [Rattus norvegicus]                                               | g112083661 (+1)  | 20 kDa  | - | 2 | - | 77 | Required for normal cytokinesis and cell signaling.                                                                                                                                                                                    |
| 85  | Cathepsin D                                                                                              | g1115720 (+1)    | 45 kDa  | - | 2 | - | 76 | Acid protease active in intracellular protein breakdown.                                                                                                                                                                               |
| 86  | alpha actinin [Rattus norvegicus]                                                                        | g11142940 (+10)  | 103 kDa | - | 2 | - | 76 | Factin cross-linking protein thought to anchor actin to a variety of intracellular structures.                                                                                                                                         |
| 87  | 26S proteasome non-ATPase regulatory subunit 1 [Rattus norvegicus]                                       | g114018079 (+1)  | 103 kDa | - | 2 | - | 75 | The multisubunit 26S proteasome recognizes, unfolds, and degrades polyubiquitinated substrates into small peptides.                                                                                                                    |
| 88  | N-alpha-acetyltransferase 25, Naflin auxiliary subunit [Rattus norvegicus]                               | g1114146788 (+2) | 111 kDa | - | 2 | - | 75 | Non-catalytic subunit of the Naflin complex which catalyzes acetylation of the N-terminal methionine residues of peptides beginning with Met-Asp-Glu. May play a role in normal cell-cycle progression.                                |
| 89  | UMP-CMP kinase [Rattus norvegicus]                                                                       | g115038503 (+1)  | 22 kDa  | - | 2 | - | 73 | Plays an important role in de novo pyrimidine nucleotide biosynthesis.                                                                                                                                                                 |
| 90  | protein FAM88B [Rattus norvegicus]                                                                       | g111025541 (+2)  | 145 kDa | - | 2 | - | 72 | Isoform 2 plays a role in promoting myogenic cell differentiation, cytoskeletal rearrangement and filopodia formation.                                                                                                                 |
| 91  | N-acetylglucosaminic acid synthase (sialic acid synthase) (predicted), isoform CRA_b [Rattus norvegicus] | g1149045843 (+1) | 32 kDa  | - | 2 | - | 71 | Enzyme.                                                                                                                                                                                                                                |
| 92  | 26S proteasome regulatory subunit 6A [Rattus norvegicus]                                                 | g113028808 (+4)  | 50 kDa  | - | 2 | - | 71 | The multisubunit 26S proteasome recognizes, unfolds, and degrades polyubiquitinated substrates into small peptides.                                                                                                                    |
| 93  | Hsp90aa 2b-regulated protein 1                                                                           | g110720774 (+2)  | 111 kDa | - | 2 | - | 70 | Has a pivotal role in cytoprotective cellular mechanisms triggered by oxygen deprivation. May be a molecular chaperone.                                                                                                                |
| 94  | Inositol protein-1-phosphatase-related protein 29 [Rattus norvegicus]                                    | g1157785944 (+1) | 20 kDa  | - | 2 | - | 69 | Essential component of the retromer complex, required to retrieve lysosomal enzyme receptors (GFP28 and M6P70) from endosomes to the trans-Golgi network.                                                                              |
| 95  | glyoxalase domain-containing protein 4 [Rattus norvegicus]                                               | g1149053439 (+1) | 27 kDa  | - | 2 | - | 67 | Function has yet to be defined.                                                                                                                                                                                                        |
| 96  | prefoldin subunit 4 like isoform 1 [Rattus norvegicus]                                                   | g114842757 (+1)  | 15 kDa  | - | 2 | - | 66 | The encoded protein is one of six subunits of prefoldin, a molecular chaperone complex that binds and stabilizes newly synthesized polypeptide.                                                                                        |
| 97  | vinorelbine [Rattus norvegicus]                                                                          | g114389209 (+1)  | 54 kDa  | 5 | 2 | - | 64 | Vinorelbine are class III intermediate filaments found in various non-epithelial cells, especially mesenchymal cells. Vinorelbine is attached to the nucleus, endoplasmic reticulum, and mitochondria, either laterally or terminally. |
| 98  | complement C3 precursor [Rattus norvegicus]                                                              | g1158138561      | 186 kDa | 1 | 2 | - | 63 | Plays a central role in the activation of the complement system.                                                                                                                                                                       |
| 99  | aminopeptidase purpurin sensitive [Rattus norvegicus]                                                    | g1149054035 (+1) | 93 kDa  | - | 2 | - | 63 | Aminopeptidase with broad substrate specificity for several peptides. Involved in proteolytic events essential for cell growth and viability.                                                                                          |
| 100 | serine/threonine-protein phosphatase 2A, 55 kDa regulatory subunit epsilon isoform [Rattus norvegicus]   | g1157618441 (+3) | 50 kDa  | - | 2 | - | 62 | Is one of the four major Ser/Thr phosphatases, implicated in the negative control of cell growth and division. The B regulatory subunit might modulate substrate selectivity and catalytic activity.                                   |
| 101 | quinone oxidoreductase-like protein 1 [Rattus norvegicus]                                                | g161556783 (+1)  | 39 kDa  | 0 | 2 | - | 60 | A protein that has sequence similarity to zeta crystallin, also known as quinone oxidoreductase.                                                                                                                                       |
| 102 | vesicular inhibitory amino acid transporter [Rattus norvegicus]                                          | g113929106 (+1)  | 57 kDa  | - | 2 | - | 60 | Involved in the uptake of GABA and glycine into the synaptic vesicles.                                                                                                                                                                 |
| 103 | Glutamate decarboxylase (GAD1)                                                                           | g1227913 (+2)    | 66 kDa  | - | 2 | - | 60 | An enzyme encoded responsible for catalyzing the production of gamma-aminobutyric acid from L-glutamic acid.                                                                                                                           |
| 104 | serotransferrin precursor [Rattus norvegicus]                                                            | g161556686       | 78 kDa  | - | 2 | - | 59 | It is responsible for the transport of iron from sites of absorption and bone degradation to those of storage and utilization.                                                                                                         |
| 105 | brain and heart protein NDRG4-81 [Rattus norvegicus]                                                     | g137788067 (+11) | 42 kDa  | - | 2 | - | 57 | Contributes to the maintenance of intracellular BDNF levels within the normal range.                                                                                                                                                   |
| 106 | hippocalin-like protein 4 [Rattus norvegicus]                                                            | g163833961       | 22 kDa  | - | 2 | - | 57 | May be involved in the calcium-dependent regulation of rhotocaps phosphorylation.                                                                                                                                                      |
| 107 | inositol polyphosphate 1-phosphatase [Rattus norvegicus]                                                 | g163846532 (+1)  | 43 kDa  | - | 2 | - | 57 | One of the enzymes involved in phosphatidylinositol signaling pathways since it removes the phosphate group at position 1 of the inositol ring from the polyphosphates inositol 1,4-bisphosphate and inositol 1,3,4-trisphosphatase.   |
| 108 | General vesicular transport factor p115                                                                  | g11171952 (+1)   | 107 kDa | - | 2 | - | 56 | General vesicular transport factor required for intercompartmental transport in the Golgi stack; it is required for transcytotic fusion and/or subsequent binding of the vesicles to the target membrane.                              |
| 109 | alcohol dehydrogenase [NADPH] [Rattus norvegicus]                                                        | g113091894       | 37 kDa  | - | 2 | - | 55 | Alcohol dehydrogenase, enzyme.                                                                                                                                                                                                         |
| 110 | beta-oxalacetate decarboxylase [Rattus norvegicus]                                                       | g116056705       | 47 kDa  | - | 2 | - | 53 | A bifunctional enzyme containing phosphoribosylaminoimidazole succinocarboxamide synthetase in its C-terminal region. It catalyzes steps 6 and 7 of purine biosynthesis.                                                               |
| 111 | Parkinson disease 7 domain-containing 1 [Rattus norvegicus]                                              | g1149051618 (+1) | 22 kDa  | - | 2 | - | 53 | Diseases associated with PDDC7 include Parkinson's disease.                                                                                                                                                                            |
| 112 | NG2LNG1-dimethylarginine dimethylaminohydrolase 1 [Rattus norvegicus]                                    | g111560131       | 31 kDa  | - | 2 | - | 50 | Regulation of nitric oxide generation.                                                                                                                                                                                                 |
| 113 | coatamer subunit delta [Rattus norvegicus]                                                               | g165030634       | 57 kDa  | - | 2 | - | 49 | A cytosolic protein complex that binds to lysine motifs and reversibly associates with Golgi non-clathrin-coated vesicles.                                                                                                             |
